# Supplementary material for: Downregulation of BRCA1-BRCA2-containing complex subunit 3 sensitizes glioma cells to temozolomide
Source: PubMed Central journal article supplement (PMC4279418; doi:10.18632/oncotarget.2543), 2014-10-29
Supplement: oncotarget-05-10901-s001.pdf [file oncotarget-05-10901-s001.pdf]

## SUPPLEMENTARY FIGURE AND TABLE

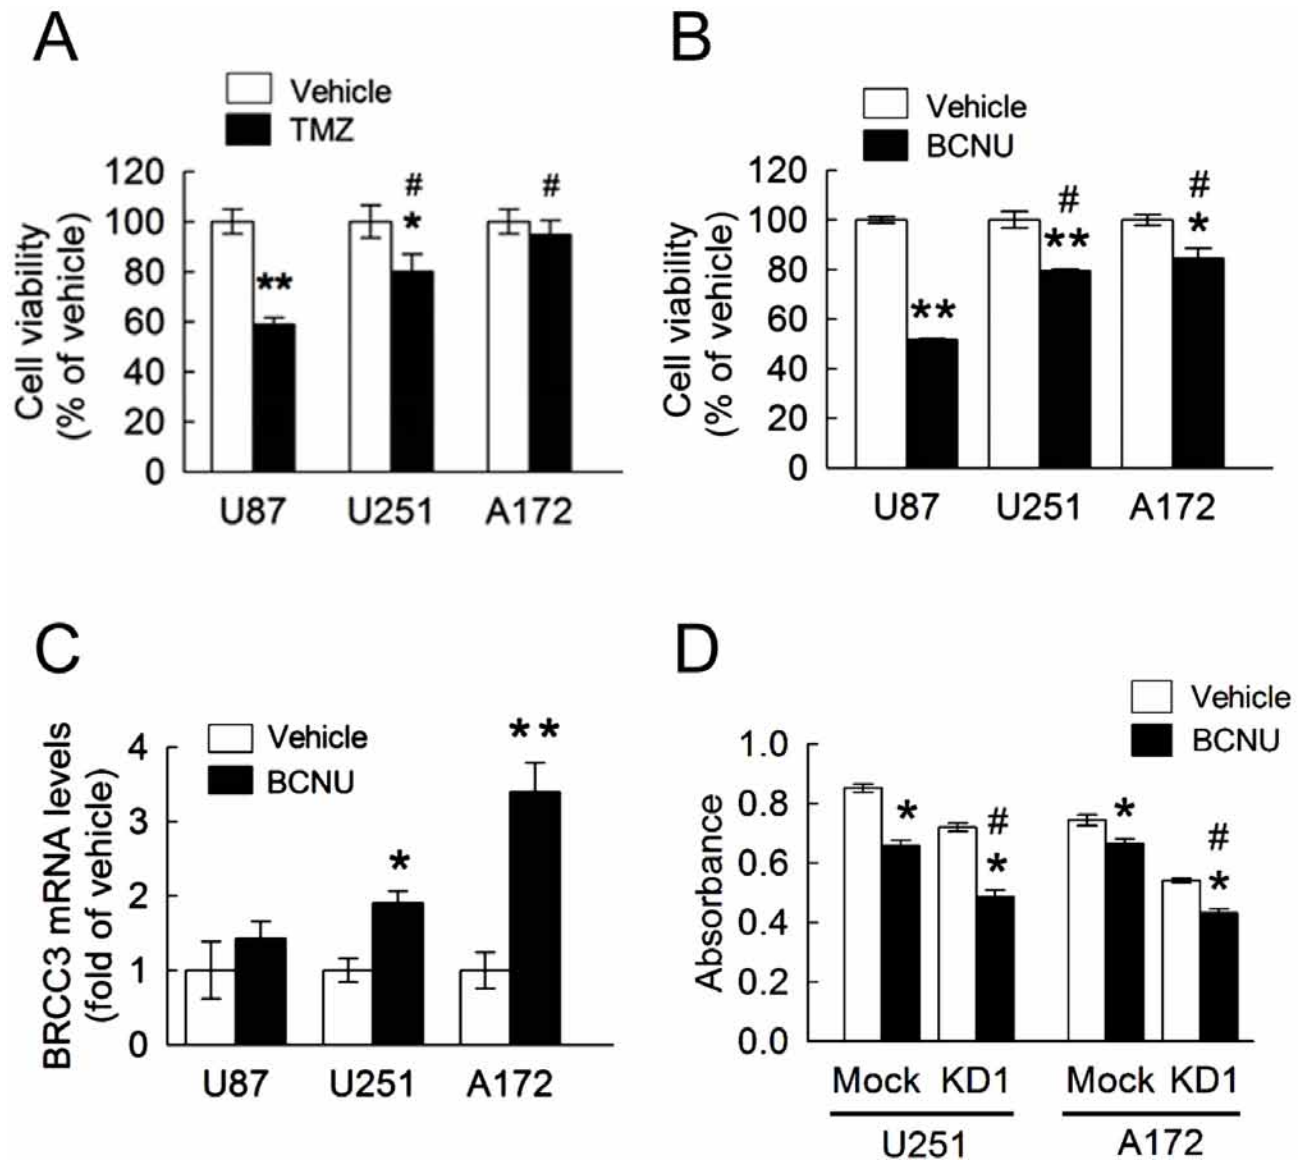

**Supplementary Figure S1: Effects of TMZ and BCNU on U251 and A172 cell viability and their BRCC3 expression.** (A, B) U87, U251 and A172 cells were treated with TMZ (200  $\mu$ M) or BCNU (100  $\mu$ M) for 48 h in the medium containing 1% FBS, and then subjected to MTT assay for the examination of the cell viability. (C) After treatment with BCNU (100  $\mu$ M) or DMSO in DMEM containing 1% FBS for 48 h, BRCC3 mRNA expression in U87, U251 and A172 cells were then determined by Q-PCR. The levels of BRCC3 mRNA expression in the BCNU-treated groups were normalized to their relative vehicle group. (D) Stable transfectants (mock, BRCC3-KD1 and BRCC3-KD2) of U251 and A172 were subjected to MTT assay after BCNU treatment for 48 h. \* $p$  < 0.05, \*\* $p$  < 0.01, versus vehicle (A-C); # $p$  < 0.05, versus TMZ- or BCNU-treated U87 (A, B); # $p$  < 0.05, versus relative BCNU-treated mock (D).

**Supplementary Table S1.** List of genes involved in Cellular Response to DNA Damage Stimulus (GO:0006974) with an increased level in tumorigenic C6 cells versus less tumorigenic C6 cells.

| Probe Set ID | Gene Symbol | Gene Title                                                        | Fold change | P value  |
|--------------|-------------|-------------------------------------------------------------------|-------------|----------|
| 1374318_at   | Brcc3       | BRCA1/BRCA2-containing complex, subunit 3                         | 23.54       | 6.46E-08 |
| 1388867_at   | MGC112830   | similar to transcription factor                                   | 2.29        | 1.03E-06 |
| 1368947_at   | Gadd45a     | growth arrest and DNA-damage-inducible, alpha                     | 2.73        | 3.02E-06 |
| 1388583_at   | Cxcl12      | chemokine (C-X-C motif) ligand 12 (stromal cell-derived factor 1) | 22.40       | 1.50E-05 |
| 1367940_at   | Cxcr7       | chemokine (C-X-C motif) receptor 7                                | 12.59       | 2.62E-05 |
| 1367664_at   | Ankrd1      | ankyrin repeat domain 1 (cardiac muscle)                          | 8.60        | 3.76E-05 |
| 1368025_at   | Ddit4       | DNA-damage-inducible transcript 4                                 | 2.43        | 7.23E-05 |
| 1370830_at   | Egfr        | epidermal growth factor receptor                                  | 7.68        | 7.41E-05 |
| 1368341_at   | Polb        | polymerase (DNA directed), beta                                   | 2.26        | 8.86E-05 |
| 1373733_at   | Bok         | BCL2-related ovarian killer                                       | 2.07        | 9.35E-05 |
| 1389735_at   | Rps6ka6     | ribosomal protein S6 kinase polypeptide 6                         | 24.05       | 1.08E-04 |
| 1382659_at   | Pla2r1      | phospholipase A2 receptor 1                                       | 6.23        | 1.24E-04 |
| 1368308_at   | Myc         | myelocytomatosis oncogene                                         | 2.07        | 1.77E-04 |
| 1368174_at   | Egln3       | EGL nine homolog 3 ( <i>C. elegans</i> )                          | 15.20       | 2.28E-04 |
| 1370912_at   | Hspa1b      | heat shock 70kD protein 1B (mapped)                               | 2.80        | 6.22E-04 |
| 1370080_at   | Hmox1       | heme oxygenase (decycling) 1                                      | 2.28        | 1.91E-03 |
| 1383439_at   | Npas2       | neuronal PAS domain protein 2                                     | 2.90        | 2.91E-03 |
| 1368311_at   | Mgmt        | O-6-methylguanine-DNA methyltransferase                           | 2.26        | 1.51E-02 |
| 1369029_at   | Plscr1      | phospholipid scramblase 1                                         | 2.03        | 4.17E-02 |
